# Supplementary material
Source: Research Square preprint supplement (doi:10.21203/rs.3.rs-9382051/v1)

**Table of Content:**

Early staged chronic kidney disease patients in India are found to be having a suboptimal dietary pattern with reduced appetite along with protein energy malnutrition which progresses with the progression rate of the disease. A hospital based cross sectional study on 184 adult CKD stage 1-3 patients found one third of the patients to be malnourished on systematic nutritional assessment. An increased trend in dietary sodium and potassium intake was observed on dietary recall which exceeded the prescribed limit.


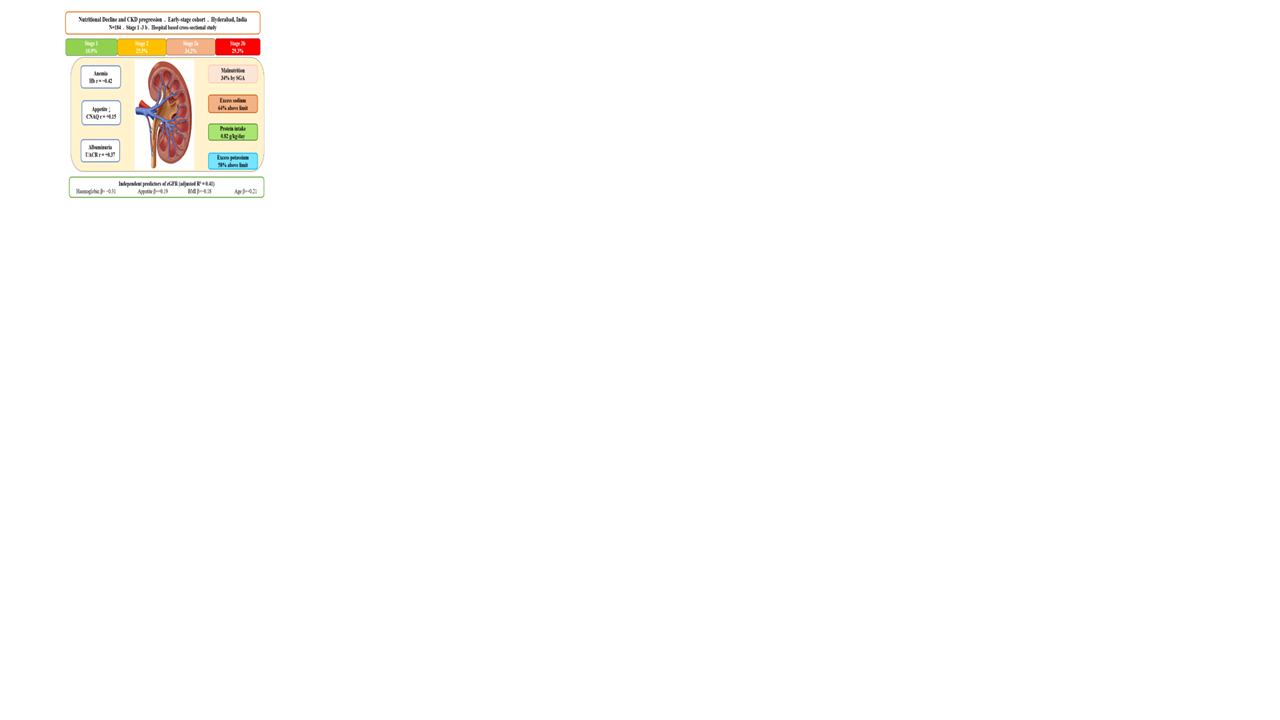

Supplement: Supplementary file 1 [file 5293f735e0018b354b508350.docx]
