# Supplementary material
Source: Research Square preprint supplement (doi:10.21203/rs.3.rs-9382051/v1)
Supplement: Supplementary file 2 [file 9c828e56bff883c672a5a9be.docx]

**Supplementary Material: Nutritional and Dietary Patterns in Early-Stage CKD Patients in India**

**Contents**

- **Table S1.** Grain and cereal consumption across CKD stages
- **Table S2.** Pulses and legume intake by CKD stage
- **Table S3.** Vegetable consumption patterns across CKD stages
- **Table S4.** Fruit consumption across CKD stages
- **Table S5.** Dairy consumption across CKD stages
- **Table S6.** Animal protein intake (chicken, fish, mutton, eggs) by CKD stage
- **Table S7.** Non-alcoholic beverage intake (tea, coffee, juices, soft drinks) across CKD stages
- **Table S8.** Snack and sweet consumption patterns across CKD stages

| **Table 1:** Association between CKD stages and Grains and Cereals consumption | | | | | | | |
| --- | --- | --- | --- | --- | --- | --- | --- |
| **Variable** | **Category** | **Frequency** | **Stage 1** | **Stage 2** | **Stage 3a n (%)** | **Stage 3b n (%)** | **p value** |
| **n (%)** | **n (%)** |
| **Grains and Cereals** | Rice | No | 0 (0.0) | 0 (0.0) | 3 (4.8) | 0 (0.0) | 0.065 |
| Daily | 18 (90.0) | 44 (93.8) | 46 (73.0) | 48 (88.9) |  |
| Weekly | 2 (10.0) | 3 (6.4) | 11(17.5) | 6 (11.1) |  |
| Monthly | 0 (0.0) | 0 (0.0) | 3(4.8) | 0 (0.0) |  |
| Roti/Chapati | No | 0 (0.0) | 1 (2.1) | 0 (0.0) | 0 (0.0) | 0.235 |
| Daily | 9 (45.0) | 26 (55.3) | 43 (68.3) | 26 (48.1) |  |
| Weekly | 11 (55.0) | 20 (42.6) | 19 (30.2) | 28 (51.9) |  |
| Monthly | 0 (0.0) | 0 (0.0) | 1 (1.6) | 0 (0.0) |  |
| Bread | No | 5 (25.0) | 9 (19.1) | 19 (30.2) | 15 (27.8) | 0.505 |
| Daily | 0 (0.0) | 0 (0.0) | 0 (0.0) | 2 (3.7) |  |
| Weekly | 3 (15.0) | 14 (29.8) | 15 (23.8) | 12 (22.2) |  |
| Monthly | 12 (60.0) | 24 (51.1) | 29 (46.0) | 25 (46.3) |  |
| Dosa | No | 0 (0.0) | 0 (0.0) | 5 (83.3) | 1 (1.9) | 0.076 |
| Weekly | 5 (25.0) | 38 (80.9) | 41 (65.1) | 33 (61.1) |  |
| Monthly | 5 (25.0) | 9 (19.1) | 17 (27.0) | 20 (37.0) |  |
| Idli | No | 0 (0.0) | 0 (0.0) | 1 (1.6) | 1 (1.9) | 0.528 |
| Weekly | 17 (85.0) | 42 (89.4) | 48 (76.2) | 47 (87.0) |  |
| Monthly | 3 (15.0) | 5 (10.6) | 14 (22.2) | 14 (11.1) |  |
| Upma | No | 0 (0.0) | 0 (0.0) | 1 (1.6) | 1 (1.9) | 0.73 |
| Weekly | 16 (80.0) | 38 (80.9) | 51 (81.0) | 48 (88.9) |  |
| Monthly | 4 (20.0) | 9 (19.1) | 11 (17.5) | 5 (9.3) |  |
| Others | No | 12 (60.0) | 31 (66.0) | 25 (39.7) | 41 (59.2) | 0.021* |
| Daily | 1 (5.0) | 1 (2.1) | 4 (6.3) | 0 (0.0) |  |
| Weekly | 4 (20.0) | 6 (12.8) | 13 (20.6) | 6 (15.8) |  |
| Monthly | 3 (15.0) | 9 (19.1) | 21 (33.3) | 40 (21.7) |  |

| **Table 2:** Association between CKD stages and Pulses and Legumes consumption. | | | | | | | |
| --- | --- | --- | --- | --- | --- | --- | --- |
| **Variable** | **Category** | **Frequency** | **Stage 1** | **Stage 2** | **Stage 3a n (%)** | **Stage 3b n (%)** | **p value** |
| **n (%)** | **n (%)** |
| **Pulses and Legumes** | Lentils | Daily | 18 (90.0) | 36 (76.6) | 45 (71.4) | 39 (72.2) | 0.565 |
| Weekly | 2 (10.0) | 11 (23.4) | 17 (27.0) | 15 (27.8) |  |
| Monthly | 0 (0.0) | 0 (0.0) | 1 (1.6) | 0 (0.0) |  |
| Chick Peas | No | 4 (20.0) | 11 (23.4) | 9 (14.3) | 26 (48.1) | 0.005* |
| Daily | 0 (0.0) | 1 (2.1) | 1 (1.6) | 1 (1.9) |  |
| Weekly | 9 (45.0) | 11 (23.4) | 18 (28.6) | 7 (13.0) |  |
| Monthly | 7 (35.0) | 24 (51.1) | 35 (55.6) | 20 (37.0) |  |
| Kidney Beans | No | 2 (10.0) | 8 (17.0) | 10 (15.9) | 18 (33.3) |  |
| Daily | 1 (5.0) | 1 (2.1) | 1 (1.6) | 0 (0.0) | 0.305 |
| Weekly | 6 (30.0) | 10 (21.3) | 15 (23.8) | 9 (16.7) |  |
| Monthly | 11 (55.0) | 28 (59.6) | 37 (58.7) | 27 (50.0) |  |
| Others | No | 16 (80.0) | 43 (91.5) | 33 (52.4) | 51 (94.4) | <0.001* |
| Weekly | 0 (0.0) | 1 (2.1) | 14 (5.5) | 1 (1.9) |  |
| Monthly | 4 (20.0) | 3 (6.4) | 16 (25.4) | 2 (3.7) |  |

| **Table 3:** Association between CKD stages and vegetable consumption | | | | | | | |
| --- | --- | --- | --- | --- | --- | --- | --- |
| **Variable** | **Category** | **Frequency** | **Stage 1** | **Stage 2** | **Stage 3a n (%)** | **Stage 3b n (%)** | **p value** |
| **n (%)** | **n (%)** |
| **Vegetables** | Green leafy Vegetables | Daily | 3 (15.0) | 13 (27.7) | 14 (22.2) | 8 (14.8) | 0.368 |
| Weekly | 16 (80.0) | 33 (70.2) | 44 (69.8) | 45 (83.3) |  |
| Monthly | 1 (5.0) | 1 (2.1) | 5 (7.9) | 1 (1.9) |  |
| Others Vegetables | Daily | 20 (100) | 47 (100) | 59 (93.7) | 54 (100) | 0.0249 |
| Weekly | 0 (0.0) | 0 (0.0) | 3 (4.8) | 0 (0.0) |  |
| Monthly | 0 (0.0) | 0 (0.0) | 1 (1.6) | 0 (0.0) |  |
| Roots and Tubers | No | 0 (0.0) | 0 (0.0) | 1 (1.6) | 0 (0.0) | <0.001* |
| Daily | 16 (80.0) | 38 (80.9) | 26 (41.3) | 37 (68.5) |  |
| Weekly | 4 (20.0) | 7 (14.9) | 21 (33.3) | 17 (31.5) |  |
| Monthly | 0 (0.0) | 2 (4.3) | 15 (23.8) | 0 (0.0) |  |
| * p-value is significant at the <0.05 level | | | |  |  |  |  |

| **Table 4:** Association between CKD stages and fruit consumption | | | | | | |  |
| --- | --- | --- | --- | --- | --- | --- | --- |
| **Variable** | **Category** | **Frequency** | **Stage 1** | **Stage 2** | **Stage 3a n (%)** | **Stage 3b n (%)** | **p value** |
| **n (%)** | **n (%)** |
| **Fruits** | Sugary fruits | No | 1 (5.0) | 2 (4.3) | 0 (0.0) | 2 (3.7) | 0.076 |
|  | Daily | 11 (55.0) | 16 (34.0) | 26 (41.3) | 26 (48.1) |  |
|  | Weekly | 6 (30.0) | 25 (53.2) | 20 (31.7) | 19 (35.2) |  |
|  | Monthly | 2 (10.0) | 4 (8.5) | 17 (27.0) | 7 (13.0) |  |
|  | Non-sugary fruits | No | 0 (0.0) | 3 (6.4) | 0 (0.0) | 1 (1.9) | 0.083 |
|  | Daily | 12 (60.0) | 16 (34.0) | 24 (38.1) | 26 (48.1) |  |
|  | Weekly | 6 (30.0) | 21 (44.7) | 21 (33.3) | 20 (37.0) |  |
|  | Monthly | 2 (10.0) | 18 (11.6) | 18 (28.6) | 7 (13.0) |  |
| * p-value is significant at the <0.05 level | | | |  |  |  |  |

| **Table 5:** Association between CKD stages and Dairy and Dairy alternatives consumption | | | | | | | | | | | | | | | | | | | | | | | |
| --- | --- | --- | --- | --- | --- | --- | --- | --- | --- | --- | --- | --- | --- | --- | --- | --- | --- | --- | --- | --- | --- | --- | --- |
| **Variable** | | | **Category** | | | **Frequency** | | | | **Stage 1** | | | **Stage 2** | | | **Stage 3a n (%)** | | | **Stage 3b n (%)** | | | **p value** | |
| **n (%)** | | | **n (%)** | | |
| **Dairy and Dairy alternatives** | | | Milk | | | No | | | | 5 (25.0) | | | 21 (44.7) | | | 14 (22.2) | | | 24 (44.4) | | | <0.001* | |
| Daily | | | | 12 (60.0) | | | 21 (44.7) | | | 20 (31.7) | | | 25 (46.3) | | |  | |
| Weekly | | | | 1 (5.0) | | | 1 (2.1) | | | 10 (15.9) | | | 2 (3.7) | | |  | |
| Monthly | | | | 2 (10.0) | | | 4 (8.5) | | | 19 (30.2) | | | 3 (8.2) | | |  | |
| Yoghurt | | | No | | | | 1 (5.0) | | | 5 (10.6) | | | 5 (7.9) | | | 1 (1.9) | | | <0.001* | |
| Daily | | | | 16 (80.0) | | | 34 (72.3) | | | 28 (44.4) | | | 47 (87.0) | | |  | |
| Weekly | | | | 3 (15.0) | | | 8 (17.0) | | | 18 (28.6) | | | 6 (11.1) | | |  | |
| Monthly | | | | 0 (0.0) | | | 0 (0.0) | | | 12 (19.0) | | | 0 (0.0) | | |  | |
| Paneer (cottage cheese) | | | No | | | | 0 (0.0) | | | 8 (17.0) | | | 5 (7.9) | | | 9 (16.7) | | | 0.008* | |
| Weekly | | | | 11 (55.0) | | | 9 (19.1) | | | 12 (19.0) | | | 10 (18.5) | | |  | |
| Monthly | | | | 9 (45.0) | | | 30 (63.8) | | | 46 (73.0) | | | 35 (64.8) | | |  | |
| Other | | | No | | | | 14 (70.0) | | | 41 (87.2) | | | 58 (92.1) | | | 49 (90.7) | | | 0.079 | |
| Daily | | | | 0 (0.0) | | | 1 (2.1) | | | 2 (3.2) | | | 0 (0.0) | | |  | |
| Weekly | | | | 2 (10.0) | | | 3 (6.4) | | | 2 (3.2) | | | 3 (5.6) | | |  | |
| Monthly | | | | 4 (20.0) | | | 2 (4.3) | | | 1 (1.6) | | | 2 (3.7) | | |  | |
| * p-value is significant at the <0.05 level | | | | | | | | | | | | |  | | |  | | |  | | |  | |
| **Table 6:** Association between CKD stages and Animal protein consumption | | | | | | | | | | | | | | | | | | | | | | |
| **Variable** | | **Category** | | | **Frequency** | | | **Stage 1** | | | **Stage 2** | | | **Stage 3a n (%)** | | | **Stage 3b n (%)** | | | **p value** | | |
| **n (%)** | | | **n (%)** | | |
| **Animal Proteins** | | Chicken | | | No | | | 12 (60.0) | | | 9 (19.1) | | | 17 (27.0) | | | 11 (20.4) | | | 0.025* | | |
| Weekly | | | 6 (30.0) | | | 30 (63.8) | | | 34 (54.0) | | | 31 (57.4) | | |  | | |
| Monthly | | | 2 (10.0) | | | 8 (17.0) | | | 12 (19.0) | | | 12 (22.2) | | |  | | |
| Fish | | | No | | | 12 (60.0) | | | 17 (36.2) | | | 23 (36.5) | | | 22 (40.7) | | | 0.285 | | |
| Weekly | | | 1 (5.0) | | | 1 (2.1) | | | 6 (9.5) | | | 2 (3.7) | | |  | | |
| Monthly | | | 7 (35.0) | | | 29 (61.7) | | | 34 (54.0) | | | 30 (55.6) | | |  | | |
| Eggs | | | No | | | 11 (55.0) | | | 8 (17.0) | | | 16 (25.4) | | | 9 (16.7) | | | 0.002* | | |
| Daily | | | 8 (40.0) | | | 18 (38.3) | | | 17 (27.0) | | | 18 (33.3) | | |  | | |
| Weekly | | | 1 (5.0) | | | 20 (42.6) | | | 25 (39.7) | | | 27 (50.0) | | |  | | |
| Monthly | | | 0 (0.0) | | | 1 (2.1) | | | 5 (7.9) | | | 0 (0.0) | | |  | | |
| Mutton | | | No | | | 12 (60.0) | | | 9 (19.1) | | | 17 (27.0) | | | 11 (20.4) | | | < 0.001* | | |
| Weekly | | | 8 (40.0) | | | 35 (74.5) | | | 33 (52.4) | | | 41 (75.9) | | |  | | |
| Monthly | | | 0 (0.0) | | | 3 (6.4) | | | 13 (20.6) | | | 2 (3.7) | | |  | | |
| Others | | | No | | | 17 (85.0) | | | 42 (89.4) | | | 41 (65.1) | | | 53 (98.1) | | | < 0.001* | | |
| Weekly | | | 0 (0.0) | | | 0 (0.0) | | | 2 (3.2) | | | 0 (0.0) | | |  | | |
| Monthly | | | 3 (15.0) | | | 5 (10.6) | | | 20 (31.7) | | | 1 (1.9) | | |  | | |
|  | |  | | |  | | |  | | |  | | |  | | |  | | |  | | |
| **Table 7:** Association between CKD stages and non-alcoholic beverage consumption | | | | | | | | | | | | | | | | | | | | |
| **Variable** | **Category** | | | **Frequency** | | | **Stage 1** | | **Stage 2** | | | **Stage 3a n (%)** | | | **Stage 3b n (%)** | | | **p value** | | |
| **n (%)** | | **n (%)** | | |
| **Non-alcoholic beverages** | Tea/Coffee | | | No | | | 1 (5.0) | | 1 (2.1) | | | 1 (1.6) | | | 0 (0.0) | | | 0.199 | | |
| Daily | | | 19 (95.0) | | 46 (97.9) | | | 57 (90.5) | | | 54 (100) | | |  | | |
| Weekly | | | 0 (0.0) | | 0 (0.0) | | | 3 (4.8) | | | 0 (0.0) | | |  | | |
| Monthly | | | 0 (0.0) | | 0 (0.0) | | | 2 (3.2) | | | 0 (0.0) | | |  | | |
| Soft Drinks | | | No | | | 11 (55.0) | | 20 (42.6) | | | 21 (33.3) | | | 39 (72.2) | | | <0.001* | | |
| Daily | | | 0 (0.0) | | 0 (0.0) | | | 0 (0.0) | | | 1 (1.9) | | |  | | |
| Weekly | | | 4 (20.0) | | 16 (34.0) | | | 8 (12.7) | | | 7 (13.0) | | |  | | |
| Monthly | | | 5 (25.0) | | 11 (23.4) | | | 34 (54.0) | | | 7 (13.0) | | |  | | |
| Fresh Fruit Juice | | | No | | | 13 (65.0) | | 31 (66.0) | | | 25 (39.7) | | | 41 (75.9) | | | <0.001* | | |
| Daily | | | 0 (0.0) | | 1 (2.1) | | | 0 (0.0) | | | 1 (1.9) | | |  | | |
| Weekly | | | 4 (20.0) | | 8 (17.0) | | | 5 (7.9) | | | 3 (5.6) | | |  | | |
| Monthly | | | 3 (15.0) | | 7 (14.9) | | | 33 (52.4) | | | 9 (16.7) | | |  | | |
| Others | | | No | | | 17 (85.0) | | 39 (83.0) | | | 30 (47.6) | | | 51 (94.4) | | | <0.001* | | |
| Weekly | | | 0 (0.0) | | 3 (6.4) | | | 6 (9.5) | | | 1 (1.9) | | |  | | |
| Monthly | | | 3 (15.0) | | 5 (10.6) | | | 27 (42.9) | | | 2 (3.7) | | |  | | |

| **Table 8:** Association between CKD stages and Snacks and Sweets consumption | | | | | | | |
| --- | --- | --- | --- | --- | --- | --- | --- |
| **Variable** | **Category** | **Frequency** | **Stage 1** | **Stage 2** | **Stage 3a n (%)** | **Stage 3b n (%)** | **p value** |
| **n (%)** | **n (%)** |
| **Snacks and Sweets** | Fried Snacks | No | 5 (25.0) | 13 (27.7) | 8 (12.7) | 28 (51.9) | 0.002* |
| Daily | 0 (0.0) | 0 (0.0) | 1 (1.6) | 1 (1.9) |  |
| Weekly | 5 (25.0) | 17 (36.2) | 25 (39.7) | 16 (29.6) |  |
| Monthly | 10 (50.0) | 17 (36.2) | 29 (46.0) | 9 (16.7) |  |
| Sweet Snacks | No | 13 (65.0) | 28 (59.6) | 19 (30.2) | 41 (75.9) | <0.001* |
| Weekly | 1 (5.0) | 7 (14.9) | 6 (9.5) | 7 (13.0) |  |
| Monthly | 6 (30.0) | 12 (25.5) | 38 (60.3) | 6 (11.1) |  |
| Bakery Items | No | 14 (70.0) | 26 (55.3) | 21 (33.3) | 50 (92.6) | <0.001* |
| Daily | 0 (0.0) | 3 (6.4) | 8 (12.7) | 0 (0.0) |  |
| Weekly | 0 (0.0) | 6 (12.8) | 14 (22.2) | 2 (3.7) |  |
| Monthly | 6 (30.0) | 12 (25.5) | 20 (31.7) | 2 (3.7) |  |
| Others | No | 20 (100) | 45 (95.7) | 34 (54.0) | 54 (100) | <0.001* |
| Weekly | 0 (0.0) | 1 (2.1) | 1 (1.6) | 0 (0.0) |  |
| Monthly | 0 (0.0) | 1 (2.1) | 28 (44.4) | 0 (0.0) |  |
| * p-value is significant at the <0.05 level | | | |  |  |  |  |
